# Large-scale GWAS reveals genetic architecture of brain white matter microstructure and genetic overlap with cognitive and mental health traits (n=17,706)

Running title: GWAS of brain white matter

Bingxin Zhao, M.S.<sup>1</sup>, Jingwen Zhang, Ph.D.<sup>2</sup>, Joseph G. Ibrahim, Ph.D.<sup>1</sup>, Tianyou Luo, B.S.<sup>1</sup>, Rebecca C. Santelli, Ph.D.<sup>3</sup>, Yun Li, Ph.D.<sup>1,4,5</sup>, Tengfei Li, Ph.D.<sup>6,7</sup>, Yue Shan, M.S.<sup>1</sup>, Ziliang Zhu, B.S.<sup>1</sup>, Fan Zhou, M.S.<sup>1</sup>, Huiling Liao, B.S.<sup>8</sup>, Thomas E. Nichols, Ph.D.<sup>9,10</sup>, and Hongtu Zhu, Ph.D.\*<sup>1</sup>

<sup>1</sup> Departments of Biostatistics, <sup>3</sup> Psychiatry, <sup>4</sup> Genetics, <sup>5</sup> Computer Science and <sup>6</sup> Radiology, University of North Carolina at Chapel Hill, Chapel Hill, NC, USA, 27599

<sup>2</sup> Department of Biostatistics, T.H. Chan School of Public Health, Harvard University, Boston, MA, USA, 02115

<sup>7</sup> Biomedical Research Imaging Center, School of Medicine, The University of North Carolina at Chapel Hill, Chapel Hill, NC, USA, 27599

<sup>8</sup> Department of Statistics, Texas A&M University, College Station, TX, USA, 77843

<sup>9</sup> Wellcome Trust Centre for Integrative Neuroimaging, Big Data Institute, University of Oxford, Oxford, UK, OX1 2JD

<sup>10</sup> Department of Statistics, University of Warwick, Coventry, UK, CV4 7AL

*\*Corresponding author:*

Hongtu Zhu

Department of Biostatistics, University of North Carolina at Chapel Hill, 3105C McGavran-Greenberg Hall, Chapel Hill, NC 27599.

Email address: [htzhu@email.unc.edu](mailto:htzhu@email.unc.edu) Phone: (919) 966-7250

Key Words: Genetic architecture; Genetic overlap; Pleiotropy; UK Biobank; DTI, White matter microstructure.

Number of words in the abstract: 227, Number of words in the main text: 3386,

Number of figures: 6, Number of tables: 0, Number of supplemental files: 2.

# 1 **Abstract**

## 2 **Background**

3 Individual variations of white matter (WM) tracts are known to be associated with  
4 various cognitive and neuropsychiatric traits. Diffusion tensor imaging (DTI) and  
5 genome-wide single-nucleotide polymorphism (SNP) data from 17,706 UK Biobank  
6 participants offer opportunity to identify novel genetic variants of WM tracts and  
7 explore the genetic overlap with other brain-related complex traits.

## 8 **Method**

9 We analyzed the genetic architecture of 110 tract-based DTI parameters, carried out  
10 genome-wide association studies (GWAS) and performed post-GWAS analyses, including  
11 association lookups, gene-based association analysis, functional gene mapping, and  
12 genetic correlation estimation.

## 13 **Results**

14 DTI parameters are substantially heritable for all WM tracts (mean heritability 48.7%).  
15 We observed a highly polygenic architecture of genetic influence across the genome  
16 ( $p\text{-value}=1.67*10^{-05}$ ) as well as the enrichment of genetic effects for active SNPs  
17 annotated by central nervous system cells ( $p\text{-value}=8.95*10^{-12}$ ). GWAS identified 213  
18 independent significant SNPs associated with 90 DTI parameters (696 SNP-level and 205  
19 locus-level associations;  $p\text{-value}<4.5*10^{-10}$ , adjusted for testing multiple phenotypes).  
20 Gene-based association study prioritized 112 significant genes, most of which are novel.  
21 More importantly, association lookups found that many of the novel SNPs and genes of  
22 DTI parameters have previously been implicated with cognitive and mental health traits.

## 23 **Conclusions**

24 The present study identifies many new genetic variants at SNP, locus and gene levels for  
25 integrity of brain WM tracts and provides the overview of pleiotropy with cognitive and  
26 mental health traits.

27

28

29

30

31

32

# 1 Introduction

2 Complex brain functions rely on dynamic interactions between distributed brain areas  
3 operating in large-scale networks. Consequently, the integrity of white matter  
4 connections between brain areas is critical to proper function. Microstructural  
5 differences in white matter (WM) tracts are phenotypically associated with information  
6 processing speed and intelligence (1-5) as well as neurodegenerative/neuropsychiatric  
7 traits, such as Alzheimer's disease (6), Parkinson's disease (7), schizophrenia (SCZ) (8),  
8 and attention-deficit/hyperactivity disorder (ADHD) (9). A better understanding of  
9 genetic factors influencing integrity of WM tracts could have important implication for  
10 understanding the etiology of these diseases as well as individual variation in  
11 intelligence. To reveal the underlying genetic contributions to brain structural  
12 development and disease/disorder processes, imaging genetics studies of WM  
13 microstructure has been an active research area over the past fifteen years. The  
14 structural changes of WM tracts are typically measured and quantified in diffusion  
15 tensor imaging (DTI) (10). Brain diffusivity can be influenced by many aspects of its  
16 micro- or macro-structures (11). To reconstruct the WM pathways and tissue  
17 microstructure, DTI models the diffusion properties of WM using random movement of  
18 water. Specifically, DTI quantifies diffusion magnetic resonance imaging (dMRI) in a  
19 tensor model and analyzes diffusions in all directions. A typical DTI diagonalizes the  
20 tensor and calculates three pairs of eigenvalues/eigenvectors that respectively  
21 represent one primary and two secondary diffusion directions. Within each voxel,  
22 several DTI parameters can be derived: fractional anisotropy (FA), mean diffusivity (MD),  
23 axial diffusivity (AD), radial diffusivity (RD), and mode of anisotropy (MO). As a summary  
24 measure of WM integrity (12, 13), higher FA indicates stronger directionality in this  
25 voxel. MD quantifies the magnitude of absolute directionality, AD is the eigenvalue of  
26 the principal direction, RD is the average of the eigenvalues of the two secondary  
27 directions, and MO is the third moment of a tensor. Positive MO reflects narrow tubular  
28 water diffusion, whereas a negative value denotes planar water diffusion (14). There are  
29 several approaches to analyze DTI data across the whole brain, including manual  
30 region-of-interest (ROI) analysis, automated ROI analysis, voxel-based analysis, such as  
31 tract-based spatial statistics (TBSS) (15), as well as tractography and graph theory  
32 analysis; see Tamnes, Roalf (16) for a survey.

1

2 In family-based studies, the magnitude of genetic influences (i.e., heritability) in various  
3 DTI parameters of WM tracts, including FA, MD, AD, and RD, has been examined across  
4 a wide age range, from neonates (17, 18), young children (19), older children (20, 21),  
5 adolescents (22), and young adults (23) to middle aged (24) and older adults (25).  
6 Participants in these studies are typically monozygotic and dizygotic twins or family  
7 members. Table 1 of Vuoksima, Panizzon (24) lists 14 studies that illustrated that a  
8 substantial proportion of variance in DTI parameters (FA, MD, AD, and RD) was  
9 explained by additive genetic effects. However, the genetic architecture of DTI  
10 parameters remains largely unknown due to the limitation of family-based studies, for  
11 which the heritability estimation has relied on contrasting the phenotypic similarity  
12 between monozygotic and dizygotic twins. Genetic architecture denotes the  
13 characteristics of genetic variations that contribute to the broad-sense heritability of a  
14 phenotype (26). Based on the number of genetic variants contributing to phenotypic  
15 variance, genetic architecture can be described as monogenic (one variant), oligogenic  
16 (few variants), polygenic (many variants), or omnigenic, which hypothesizes that almost  
17 all genetic variants have small but non-zero genetic contributions (27, 28). Uncovering  
18 the genetic architecture and discovering the associated genetic variants are essential  
19 steps to delineate the functional mechanisms and understand the genetic overlap  
20 between white matter structures and neuropsychiatric traits.

21

22 Recent developments have enabled heritability estimation and genetic variants  
23 discovery with using the common single-nucleotide polymorphisms (SNPs) data  
24 collected in general populations. Instead of using the expected genetic correlation based  
25 on pedigree information, SNP heritability is estimated by adding up the genetic effects  
26 across a large number of common SNPs (minor allele frequency [MAF]>0.05 or 0.01) (29,  
27 30). The architecture of genetic influences can be assessed by SNP annotation and  
28 partition (31, 32). Genome-wide association studies (GWAS) and post-GWAS analysis  
29 can further identify causal genetic variants at SNP, locus and gene levels (33, 34), and  
30 assess the genetic overlap of complex traits in different domains (35, 36). With these  
31 methods, the availability of genomic and imaging data from recent large  
32 population-based United Kingdom (UK) Biobank resource (37) offers the opportunity to



uncover the genetic basis of brain WM tracts in one large-scale, relatively homogeneous population. The UK Biobank has captured data from over 500,000 original participants of middle or elderly ages (age range 40-69), and is currently in the process of following up with 100,000 of these participants to perform brain MRI screening (38).

Here we generated 110 tract-based DTI parameters using the British ancestry UKB sample including 17,706 participants. For each of the 110 phenotypes, we estimated the SNP-heritability, assessed the distribution of genetic effects by SNP annotation and partition, and carried out GWAS to identify the associated genetic variants at SNP and locus levels. We further discovered gene-level associations via MAGMA (39), and explored the functional consequences of the significant SNPs by functional mapping and annotation analysis (FUMA, (34)). To detect genetic overlap and pleiotropy in WM tracts and other complex traits, we performed association lookups at SNP and gene levels on the NHGRI-EBI GWAS catalog (40) and estimated genetic correlations via LD score regression (LDSC, (36)). The GWAS summary statistics have been made publicly available at <https://med.sites.unc.edu/bigs2/data/gwas-summary-statistics/>.

## Materials and Methods

### Participants and image preprocessing

We used data from 17,706 UKB individuals of British ancestry (self-reported ethnic background, Data-Field 21000). The DTI data (38) and covariates were downloaded from the UKB data resource. We generated 110 DTI parameters: FA, AD, MD, MO and RD of 21 WM tracts, and their average values across these tracts. The ID and full names of the 21 WM tracts are listed in **Supplementary Table 1**. A full description of the DTI registration and quality controls is documented in supplementary information and an overview is given in **Supplementary Figure 1**. We removed values greater than five times the median absolute deviation from the median in each continuous variable. All individuals were aged between 40 and 80 years and the proportion of females was 52.9%.

### Genotyping and quality control

1 We downloaded the imputed SNP data from UKB data resource (41). We further  
2 performed the following SNP data quality controls using PLINK (42): excluding subjects  
3 with more than 10% missing genotypes, only including SNPs with MAF > 0.01,  
4 genotyping rate > 90%, and passing Hardy-Weinberg test ( $p\text{-value} > 1 \times 10^{-7}$ ). We also  
5 removed SNPs with imputation INFO score less than 0.8.

6

## 7 **SNP-heritability analysis and genome-wide association analysis**

8 For each of the 110 DTI parameters, we estimated the proportion of variation explained  
9 by all autosomal SNPs with using linear mixed-effects model (LMM) via GCTA (29). We  
10 considered the fixed effects of age (at imaging), age-squared, gender, age-gender  
11 interaction, age-squared-gender interaction, as well as the top 40 genetic principal  
12 components (GPCs, Data-Field 22009). We also estimated the proportion of variation  
13 explained by SNPs in each chromosome. In addition, we partitioned the SNPs according  
14 to cell-type-specific annotations (32) to perform enrichment analysis. SNPs were  
15 grouped according to their functional activeness in various cell groups and specifically in  
16 the central nervous system (CNS) cell group: CNS\_active, CNS\_inactive, and  
17 Always\_inactive, see supplementary information for detailed definitions. We performed  
18 GWAS for each DTI parameter separately with PLINK (42). The same set of covariates  
19 were adjusted in all heritability and GWAS analyses.

20

## 21 **Genomic risk loci characterization and comparison with previous findings**

22 We characterized genomic risk loci by using FUMA (34) online platform (v1.3.4). FUMA  
23 first identified independent significant SNPs, which were defined as significant SNPs that  
24 were independent of each other ( $R^2 < 0.6$ ). FUMA then constructed LD block for  
25 independent significant SNPs by tagging all SNPs that had a MAF  $\geq 0.0005$  and were in  
26 LD ( $R^2 \geq 0.6$ ) with at least one of the independent significant SNPs. If LD blocks of  
27 independent significant SNPs were closed ( $< 250$  kb based on the closest boundary SNPs  
28 of LD blocks), they were merged to a single genomic locus. More details of FUMA  
29 analysis can be found in (34). Independent significant SNPs and all SNPs in LD with them  
30 were subsequently searched on NHGRI-EBI GWAS catalog (40) (v2019-01-31) to look for  
31 reported associations ( $p\text{-value} < 9 \times 10^{-6}$ ) with any traits.

32

## 1 **Gene-based association analysis and functional annotation**

2 We carried out gene-based association analysis for 18,796 protein-coding candidate  
3 genes via MAGMA (39) (v1.07). Gene-based p-values were calculated by summarizing  
4 the GWAS results of corresponding SNPs, which were mapped to genes according to  
5 their physical positions. Significant genes were searched on NHGRI-EBI GWAS catalog  
6 (40) (v2019-01-31) to look for their previously reported associations with any traits. We  
7 focused on brain-related complex traits and characterized them into six groups:  
8 cognitive (e.g., general cognitive ability, cognitive performance, math ability, and  
9 intelligence), education (e.g., years of education and college completion), reaction time,  
10 neuroticism, neurodegenerative diseases (e.g., Alzheimer's disease, Parkinson's disease  
11 and corticobasal degeneration), and neuropsychiatric disorders (e.g., major depressive  
12 disorder [MDD], SCZ, bipolar disorder [BD], ADHD, alcohol use disorder, and autism  
13 spectrum disorder).

14  
15 We also performed functional gene annotation and mapping via FUMA. SNPs were  
16 annotated with their biological functionality and then were linked to genes by a  
17 combination of positional, expression quantitative trait loci (eQTL) association, and 3D  
18 chromatin interaction mappings. Specifically, independent significant SNPs and all SNPs  
19 in LD with them were annotated for gene functional consequences by ANNOVAR (43).  
20 The annotated SNPs were mapped to 35,808 candidate genes based on physical position  
21 on the genome (tissue/cell types for 15-core chromatin state: brain), eQTL associations  
22 (tissue types: GTEx v7 brain (44), BRAINEAC (45), and CommonMind Consortium (46))  
23 and chromatin interaction mapping (built-in chromatin interaction data: dorsolateral  
24 prefrontal cortex, hippocampus (47); annotate enhancer/promoter regions: E053-E082  
25 brain (48)). We used default values for all other parameters in FUMA.

26

## 27 **Genetic correlation estimation with LDSC**

28 We used LDSC (v1.0.0, <https://github.com/bulik/ldsc>) to estimate the pairwise genetic  
29 correlation between DTI parameters and other traits by their GWAS summary statistics.  
30 In LDSC, we used the pre-calculated LD scores provided by LDSC  
31 (<https://data.broadinstitute.org/alkesgroup/LDSCORE/>), which were computed using

1 1000 Genomes European data. We used HapMap3 SNPs and removed all SNPs in  
2 chromosome 6 in the MHC region.

3

## 4 **Results**

### 5 **SNP heritability estimation**

6 **Figures 1-2** and **Supplementary Figures 2-7** display the SNP heritability of DTI  
7 parameters estimated by all common autosomal SNPs. The associated standard errors,  
8 raw and Bonferroni-adjusted p-values from the one-sided likelihood ratio tests are given  
9 in **Supplementary Table 2**. All SNP heritability estimates were significantly larger than  
10 zero (Bonferroni-adjusted p-value<0.004). Genetic factors accounted for a moderate or  
11 large portion of the variance of DTI parameters in all WM tracts (mean heritability 0.487,  
12 standard errors are around 0.041). For example, genetic effects explained more than  
13 60% of the total variance of FA in the posterior limb of the internal capsule (PLIC),  
14 anterior corona radiata (ACR), superior longitudinal fasciculus (SLF), and cingulum  
15 cingulate gyrus (CGC). SNP heritability of FA decreased to 37% and 27%, respectively, in  
16 the fornix (FX) and corticospinal tract (CST). According to the functions of the WM tracts  
17 (Connectopedia Knowledge Database, <http://www.fmritools.com/kdb/white-matter/>),  
18 we clustered them into four communities: complex fibers (C1), associative fibers (C2),  
19 commissural fibers (C3) and projection fibers (C4). We found that the set of WM tracts  
20 in C1 and C3 (mean=0.512) tended to have higher SNP heritability than those in C2 and  
21 C4 (mean=0.440, p-value=2.16\*10<sup>-04</sup>).

22

### 23 **Partitioning and annotating genetic variation**

24 To examine the distribution of SNP heritability across the genome, we partitioned SNP  
25 data into 22 chromosomes and estimated the SNP heritability by each chromosome  
26 (**Supplementary Table 3**). We found that the mean heritability across all 110 DTI  
27 parameters explained by each chromosome was linearly associated with the length of  
28 the chromosome (**Figure 3(a)**, R<sup>2</sup>=61.2%, p-value=1.67\*10<sup>-05</sup>). This finding reveals a  
29 highly polygenic or omnigenic genetic architecture (28) of WM tracts. The large number  
30 of SNPs that contribute to the variation in DTI parameters are widely spread across the  
31 whole genome. To further illustrate this architecture, we ordered and clustered the 22  
32 chromosomes into three groups by their lengths: long, medium, and short. The long

1 group had 4 chromosomes (CHRs 2, 1, 6, 3), which together accounted for 33% of the  
2 length of the whole genome; the medium group had 6 chromosomes (CHRs 4, 5, 7, 8, 10,  
3 11), which accounted for another 33% of the length of the whole genome; and the short  
4 group consisted of the remaining 12 chromosomes. **Figure 3(b)** shows the SNP  
5 heritability estimates grouped by chromosomal length. It is clear that longer  
6 chromosomes tended to have higher SNP heritability estimates than medium  
7 ( $p\text{-value}=3.82 \times 10^{-13}$ ) or shorter ( $p\text{-value}<2.20 \times 10^{-16}$ ) ones for DTI parameters.

8

9 To compare the contribution of SNPs with different activity level, we partitioned the  
10 genetic variation according to CNS-cell-specific annotations: CNS\_active, CNS\_inactive,  
11 and Always\_inactive (**Supplementary Table 4**). Heritability estimated by SNPs residing in  
12 chromatin regions inactive across all cell groups (Always\_inactive) was clearly much  
13 smaller than the heritability estimated by SNPs residing in chromatin regions active in  
14 CNS cell (CNS\_active,  $p\text{-value}<2.20 \times 10^{-16}$ ). The heritability estimated by CNS\_inactive  
15 SNPs (inactive in CNS cell but active in other cells) was also significantly smaller than  
16 that of CNS\_active SNPs ( $p\text{-value}=8.95 \times 10^{-12}$ ) (**Figure 3(c)**). This pattern remained  
17 consistent across all the five types of DTI parameters, though larger variance was  
18 observed for the MO parameters.

19

## 20 **GWAS results of 110 DTI parameters**

21 We carried out GWAS for the 110 DTI parameters with using 8,955,960 SNPs after  
22 genotyping quality controls. All Manhattan and QQ plots are shown in **Supplementary**  
23 **Figure 8**. 19,530 significant associations were detected at the  $4.5 \times 10^{-10}$  significance level  
24 (that is,  $5 \times 10^{-8}/110$ , adjusted for testing multiple phenotypes) (**Supplementary Figure 9**,  
25 **Supplementary Table 5**). RD and MD of anterior limb of internal capsule (ALIC) had  
26 more than 3,000 significant associations. Significant SNPs were summarized into 213  
27 independent significant SNPs by FUMA, which had 696 independent significant  
28 associations with 90 DTI parameters (**Figure 4, Supplementary Tables 6-7**). RD and FA of  
29 splenium of corpus callosum (SCC) had the largest number of independent significant  
30 SNPs. 502 of the 696 independent significant associations located in chromosome 5  
31 (**Supplementary Table 8, Supplementary Figure 10**). The 696 independent significant  
32 SNP-level associations can be further characterized as 205 locus-level associations

1 **(Supplementary Table 9)**. FA and RD of SCC, FA and AD of FX, and RD of ALIC had at  
2 least five genetic risk loci **(Supplementary Table 10)**. Each chromosome had at least one  
3 genetic risk locus except for chromosomes 13, 20 and 21, and chromosome 5 had the  
4 largest number of risk loci **(Supplementary Tables 11)**. GWAS results at  $5 \times 10^{-9}$  and  
5  $5 \times 10^{-8}$  significance levels are also reported in above tables and figures.

## 6 7 **Concordance with previous GWAS results**

8 Association lookups on the NHGRI-EBI GWAS catalog (40) found that 122 of the 213  
9 independent significant SNPs (associated with 83 DTI parameters) were reported to be  
10 associated with any traits **(Supplementary Table 12)**. Our study replicated many SNPs  
11 reported in previous GWAS of WM hyperintensity measures and other brain structural  
12 measures **(Supplementary Table 13)**, most of which were recently detected in  
13 Rutten-Jacobs, Tozer (49) ( $n=8,448$ ). In addition, we tagged 15 different SNPs associated  
14 with neuropsychiatric disorders, 40 with cognitive traits, 12 with education, 47 with  
15 neuroticism, 17 with neurodegenerative diseases, and 2 with reaction time. We also  
16 compared our results with the those reported in Elliott, Sharp (50) ( $n=8,428$ ) and found  
17 that 212 of the 368 significant associations (Supplementary Table 6 of (50)) were  
18 replicated in the present study. We note that the both (49) and (50) analyzed a subset of  
19 the sample presented in this study.

## 20 21 **Gene-based association analysis and functional mapping**

22 Gene-based association analysis identified 508 significant gene-level associations  
23 ( $p\text{-value} < 2 \times 10^{-8}$ , adjusted for testing multiple phenotypes) between 112 genes and 96  
24 DTI parameters **(Supplementary Table 14)**. Our results replicated genes discovered in  
25 Rutten-Jacobs, Tozer (49) and Elliott, Sharp (50), including *VCAN*, *C16orf95*, *NBEAL1*,  
26 *SH3PXD2A*, *CACNB2*, *SRA1*, *GNA12*, *CPED1*, and *EPHA3*, but most of the identified genes  
27 were not previously linked to DTI parameters. Association lookups found that 51 of the  
28 112 significant genes were implicated with cognitive, education, reaction, neuroticism,  
29 neuropsychiatric and neurodegenerative traits in previous studies, such as *CRHR1*  
30 (51-54), *MAPT* (55-58), *KANSL1* (59-61), and *MSRA* (62-64) **(Supplementary Table 15,**  
31 **Figure 5)**. We also annotated the SNPs by functional consequences on gene functions  
32 **(Supplementary Figure 11)** and performed functional gene mapping. Gene mapping

1 discovered 292 genes (**Supplementary Table 16**), 218 of which were not detected in the  
2 gene-based association analysis.

3

#### 4 **Genetic correction with other traits**

5 We estimated the pairwise genetic correlation between 110 DTI parameters and 14  
6 other complex traits (**Supplementary Table 17**). We focused on traits showing evidence  
7 of pleiotropy in association lookups. 43 pairs of phenotypes had significant genetic  
8 correlation after adjusting for multiple testing (1,540 tests) by the Benjamini-Hochberg  
9 (B-H) procedure (65) at 0.05 level (**Supplementary Table 18, Supplementary Figure 12**).  
10 Reaction time had significant negative correlations with FA parameters (mean=-0.181),  
11 and had widespread positive correlations with AD, MO, MD and RD (mean=0.165)  
12 (**Figure 6**). Education, cognitive, intelligence, and numerical reasoning also had positive  
13 genetic correlations with AD, FA, and MO. On the other hand, depression, MDD and  
14 drink frequency showed negative genetic correlations with FA. Other pairs were  
15 insignificant after multiple testing adjustment.

16

#### 17 **Discussion**

18 Heritability and GWAS analyses can provide guidance for downstream analyses to model  
19 the functional mechanisms and pathways involved in the phenotype of interest or its  
20 pleiotropy traits. A large number of family-based neuroimaging studies have  
21 documented that WM tracts are essentially heritable across the lifespan. Two recent  
22 GWAS (49, 50) have made attempts to explore the genetic risk variants of DTI  
23 parameters, however, they were less powered due to the limited sample size ( $n < 9,000$ ).  
24 With the DTI and common autosomal SNP data from 17,706 UKB participants, the  
25 present study made novel contributions to 1) understand the genetic landscape of WM  
26 tract; 2) identify novel genetic risk variants at SNP, locus, and gene levels; and 3) provide  
27 the overview of statistical pleiotropy (35, 66) with other brain-related complex traits.

28

29 Our SNP heritability estimates are close to the ones reported in previous family-based  
30 studies (e.g., Table 1 of (24)), and are also within a similar range as those reported in  
31 (50), where the mean heritability is around 0.450. These results suggest that studies of  
32 DTI phenotypes using common SNPs may be more informative than studies focused on



1 rare variants. Our results partitioning the genetic variation in chromosomes or SNP  
2 functional sets shed light on the distribution of genetic signals across the genome and  
3 different functional consequences. These findings suggest a highly polygenic genetic  
4 architecture of DTI parameters and also provide evidence for stronger genetic signals  
5 from SNPs in active chromatin regions, especially for those active in the CNS cell type.  
6 For such highly polygenic traits, large sample size is essential for GWAS to discover the  
7 widespread genetic signals (67). Compared to previous GWAS (49, 50), our study with  
8 larger sample size identifies many newly associated genetic variants for DTI parameters.  
9 More importantly, these novel findings uncover the widespread pleiotropy between DTI  
10 parameters and cognitive and mental health traits. As the UKB releases more imaging  
11 data, it can be expected that better powered genetic studies on heritable WM tracts will  
12 continue facilitating gene exploration and helping understand the causal relationships of  
13 brain-related complex traits.

14  
15 Our analyses reflect several methodological limitations of the current approaches on  
16 population-based imaging genetic studies. First, similar to previous studies (23), CST and  
17 FX were reported to have low SNP heritability, which may be due to the fact that such  
18 small, tubular tracts cannot be well registered and reliably resolved with current  
19 techniques (68). Second, heritability estimated by SNP data reflects narrow-sense  
20 heritability, which only considers the additive genetic effects of common variants. The  
21 genetic architecture may change as we broadly consider all genetic contributions (such  
22 as rare variants, non-additive effects and gene-gene interactions) in future studies.  
23 However, it is notable that with common SNPs in the UK Biobank, we have gained  
24 heritability estimates comparable to those reported in family-based studies. Finally, it is  
25 worth mentioning that the UKB data used in this study were sampled from a specific  
26 cohort (British ancestry) with a specific age-range. Since genetic ancestries are common  
27 confounding effects and aging can play an important role in brain WM structure changes,  
28 one should be careful to generalize these findings to general populations or to specific  
29 clinical cohorts. With more data from diverse imaging genetics studies, future research  
30 will be required to overcome these limitations and advance our biological understanding  
31 of the human brain.



## 1 **Funding**

2 This research was partially supported by U.S. NIH grants MH086633 and MH116527, and  
3 a grant from the Cancer Prevention Research Institute of Texas.

## 5 **Acknowledgements**

6 We thank the individuals represented in the UK Biobank dataset for their participation  
7 and the research teams for their work in collecting, processing and disseminating these  
8 datasets for analysis. This research has been conducted using the UK Biobank resource  
9 (application number 22783), subject to a data transfer agreement. We gratefully  
10 acknowledge all the studies and databases that made their GWAS summary data  
11 available. The authors acknowledge the Texas Advanced Computing Center (TACC, <http://www.tacc.utexas.edu>) at The University of Texas at Austin for providing HPC and  
13 storage resources that have contributed to the research results reported within this  
14 paper.

## 16 **Conflict of interest**

17 The authors declare no competing financial interests.

## 19 **REFERENCES**

- 20 1. Penke L, Maniega SM, Murray C, Gow AJ, Hernández MCV, Clayden JD, et al. (2010):  
21 A general factor of brain white matter integrity predicts information processing speed in  
22 healthy older people. *Journal of Neuroscience*. 30:7569-7574.
- 23 2. Penke L, Maniega SM, Bastin M, Hernández MV, Murray C, Royle N, et al. (2012):  
24 Brain-wide white matter tract integrity is associated with information processing speed  
25 and general intelligence. *Molecular psychiatry*. 17:955.
- 26 3. Tamnes CK, Østby Y, Walhovd KB, Westlye LT, Due-Tønnessen P, Fjell AM (2010):  
27 Intellectual abilities and white matter microstructure in development: a diffusion tensor  
28 imaging study. *Human brain mapping*. 31:1609-1625.
- 29 4. Ritchie SJ, Bastin ME, Tucker-Drob EM, Maniega SM, Engelhardt LE, Cox SR, et al.  
30 (2015): Coupled changes in brain white matter microstructure and fluid intelligence in  
31 later life. *Journal of Neuroscience*. 35:8672-8682.

- 1 5. Ritchie SJ, Booth T, Hernández MdCV, Corley J, Maniega SM, Gow AJ, et al. (2015):  
2 Beyond a bigger brain: Multivariable structural brain imaging and intelligence.  
3 *Intelligence*. 51:47-56.
- 4 6. Nir TM, Jahanshad N, Villalon-Reina JE, Toga AW, Jack CR, Weiner MW, et al. (2013):  
5 Effectiveness of regional DTI measures in distinguishing Alzheimer's disease, MCI, and  
6 normal aging. *NeuroImage: clinical*. 3:180-195.
- 7 7. Bohnen NI, Albin RL (2011): White matter lesions in Parkinson disease. *Nature*  
8 *Reviews Neurology*. 7:229.
- 9 8. Voineskos AN (2015): Genetic underpinnings of white matter 'connectivity':  
10 heritability, risk, and heterogeneity in schizophrenia. *Schizophrenia research*. 161:50-60.
- 11 9. Sudre G, Choudhuri S, Szekely E, Bonner T, Goduni E, Sharp W, et al. (2017):  
12 Estimating the Heritability of Structural and Functional Brain Connectivity in Families  
13 Affected by Attention-Deficit/Hyperactivity Disorder. *JAMA psychiatry*. 74:76-84.
- 14 10. Bassar PJ, Mattiello J, LeBihan D (1994): Estimation of the effective self-diffusion  
15 tensor from the NMR spin echo. *Journal of Magnetic Resonance, Series B*. 103:247-254.
- 16 11. Beaulieu C (2002): The basis of anisotropic water diffusion in the nervous system—a  
17 technical review. *NMR in Biomedicine*. 15:435-455.
- 18 12. Thomason ME, Thompson PM (2011): Diffusion imaging, white matter, and  
19 psychopathology. *Annual review of clinical psychology*. 7.
- 20 13. Jones DK, Knösche TR, Turner R (2013): White matter integrity, fiber count, and  
21 other fallacies: the do's and don'ts of diffusion MRI. *Neuroimage*. 73:239-254.
- 22 14. Cox SR, Ritchie SJ, Tucker-Drob EM, Liewald DC, Hagenaars SP, Davies G, et al.  
23 (2016): Ageing and brain white matter structure in 3,513 UK Biobank participants.  
24 *Nature communications*. 7:13629.
- 25 15. Smith SM, Jenkinson M, Johansen-Berg H, Rueckert D, Nichols TE, Mackay CE, et al.  
26 (2006): Tract-based spatial statistics: voxelwise analysis of multi-subject diffusion data.  
27 *Neuroimage*. 31:1487-1505.
- 28 16. Tamnes CK, Roalf DR, Goddings A-L, Lebel C (2017): Diffusion MRI of white matter  
29 microstructure development in childhood and adolescence: methods, challenges and  
30 progress. *Developmental cognitive neuroscience*.

17. Geng X, Gouttard S, Sharma A, Gu H, Styner M, Lin W, et al. (2012): Quantitative tract-based white matter development from birth to age 2years. *Neuroimage*. 61:542-557.
18. Lee SJ, Steiner RJ, Luo S, Neale MC, Styner M, Zhu H, et al. (2015): Quantitative tract-based white matter heritability in twin neonates. *NeuroImage*. 111:123-135.
19. Lee SJ, Steiner RJ, Yu Y, Short SJ, Neale MC, Styner MA, et al. (2017): Common and heritable components of white matter microstructure predict cognitive function at 1 and 2 y. *Proceedings of the National Academy of Sciences*. 114:148-153.
20. Brouwer RM, Mandl RC, Peper JS, van Baal GCM, Kahn RS, Boomsma DI, et al. (2010): Heritability of DTI and MTR in nine-year-old children. *Neuroimage*. 53:1085-1092.
21. Brouwer RM, Mandl RC, Schnack HG, van Soelen IL, van Baal GC, Peper JS, et al. (2012): White matter development in early puberty: a longitudinal volumetric and diffusion tensor imaging twin study. *PloS one*. 7:e32316.
22. Chiang M-C, Barysheva M, Toga AW, Medland SE, Hansell NK, James MR, et al. (2011): BDNF gene effects on brain circuitry replicated in 455 twins. *Neuroimage*. 55:448-454.
23. Kochunov P, Jahanshad N, Marcus D, Winkler A, Sprooten E, Nichols TE, et al. (2015): Heritability of fractional anisotropy in human white matter: a comparison of Human Connectome Project and ENIGMA-DTI data. *Neuroimage*. 111:300-311.
24. Vuoksima E, Panizzon MS, Hagler Jr DJ, Hatton SN, Fennema-Notestine C, Rinker D, et al. (2017): Heritability of white matter microstructure in late middle age: A twin study of tract-based fractional anisotropy and absolute diffusivity indices. *Human brain mapping*. 38:2026-2036.
25. Kanchibhotla SC, Mather KA, Wen W, Schofield PR, Kwok JB, Sachdev PS (2013): Genetics of ageing-related changes in brain white matter integrity—A review. *Ageing research reviews*. 12:391-401.
26. Timpson NJ, Greenwood CM, Soranzo N, Lawson DJ, Richards JB (2017): Genetic architecture: the shape of the genetic contribution to human traits and disease. *Nature Reviews Genetics*.
27. Badano JL, Katsanis N (2002): Beyond Mendel: an evolving view of human genetic disease transmission. *Nature reviews Genetics*. 3:779.

- 1 28. Boyle EA, Li YI, Pritchard JK (2017): An Expanded View of Complex Traits: From  
2 Polygenic to Omnigenic. *Cell*. 169:1177-1186.
- 3 29. Yang J, Lee SH, Goddard ME, Visscher PM (2011): GCTA: a tool for genome-wide  
4 complex trait analysis. *The American Journal of Human Genetics*. 88:76-82.
- 5 30. Loh P-R, Bhatia G, Gusev A, Finucane HK, Bulik-Sullivan BK, Pollack SJ, et al. (2015):  
6 Contrasting genetic architectures of schizophrenia and other complex diseases using  
7 fast variance-components analysis. *Nature genetics*. 47:1385-1392.
- 8 31. Yang J, Manolio TA, Pasquale LR, Boerwinkle E, Caporaso N, Cunningham JM, et al.  
9 (2011): Genome partitioning of genetic variation for complex traits using common SNPs.  
10 *Nature genetics*. 43:519.
- 11 32. Finucane HK, Bulik-Sullivan B, Gusev A, Trynka G, Reshef Y, Loh P-R, et al. (2015):  
12 Partitioning heritability by functional annotation using genome-wide association  
13 summary statistics. *Nature genetics*. 47:1228-1235.
- 14 33. Visscher PM, Wray NR, Zhang Q, Sklar P, McCarthy MI, Brown MA, et al. (2017): 10  
15 years of GWAS discovery: biology, function, and translation. *The American Journal of*  
16 *Human Genetics*. 101:5-22.
- 17 34. Watanabe K, Taskesen E, Bochoven A, Posthuma D (2017): Functional mapping and  
18 annotation of genetic associations with FUMA. *Nature communications*. 8:1826.
- 19 35. Watanabe K, Stringer S, Frei O, Mirkov MU, Polderman TJ, van der Sluis S, et al.  
20 (2018): A global view of pleiotropy and genetic architecture in complex traits.  
21 *bioRxiv*.500090.
- 22 36. Bulik-Sullivan B, Finucane HK, Anttila V, Gusev A, Day FR, Loh P-R, et al. (2015): An  
23 atlas of genetic correlations across human diseases and traits. *Nature genetics*. 47:1236.
- 24 37. Sudlow C, Gallacher J, Allen N, Beral V, Burton P, Danesh J, et al. (2015): UK biobank:  
25 an open access resource for identifying the causes of a wide range of complex diseases  
26 of middle and old age. *PLoS medicine*. 12:e1001779.
- 27 38. Alfaro-Almagro F, Jenkinson M, Bangerter NK, Andersson JL, Griffanti L, Douaud G,  
28 et al. (2018): Image processing and Quality Control for the first 10,000 brain imaging  
29 datasets from UK Biobank. *NeuroImage*. 166:400-424.
- 30 39. de Leeuw CA, Mooij JM, Heskes T, Posthuma D (2015): MAGMA: generalized  
31 gene-set analysis of GWAS data. *PLoS computational biology*. 11:e1004219.

- 1 40. Buniello A, MacArthur JAL, Cerezo M, Harris LW, Hayhurst J, Malangone C, et al.  
2 (2018): The NHGRI-EBI GWAS Catalog of published genome-wide association studies,  
3 targeted arrays and summary statistics 2019. *Nucleic acids research*. 47:D1005-D1012.
- 4 41. Bycroft C, Freeman C, Petkova D, Band G, Elliott LT, Sharp K, et al. (2017):  
5 Genome-wide genetic data on ~ 500,000 UK Biobank participants. *BioRxiv*.166298.
- 6 42. Purcell S, Neale B, Todd-Brown K, Thomas L, Ferreira MA, Bender D, et al. (2007):  
7 PLINK: a tool set for whole-genome association and population-based linkage analyses.  
8 *The American Journal of Human Genetics*. 81:559-575.
- 9 43. Wang K, Li M, Hakonarson H (2010): ANNOVAR: functional annotation of genetic  
10 variants from high-throughput sequencing data. *Nucleic acids research*. 38:e164-e164.
- 11 44. Consortium G (2015): The Genotype-Tissue Expression (GTEx) pilot analysis:  
12 multitissue gene regulation in humans. *Science*. 348:648-660.
- 13 45. Ramasamy A, Trabzuni D, Guelfi S, Varghese V, Smith C, Walker R, et al. (2014):  
14 Genetic variability in the regulation of gene expression in ten regions of the human  
15 brain. *Nature neuroscience*. 17:1418.
- 16 46. Fromer M, Roussos P, Sieberts SK, Johnson JS, Kavanagh DH, Perumal TM, et al.  
17 (2016): Gene expression elucidates functional impact of polygenic risk for schizophrenia.  
18 *Nature neuroscience*. 19:1442.
- 19 47. Schmitt AD, Hu M, Jung I, Xu Z, Qiu Y, Tan CL, et al. (2016): A compendium of  
20 chromatin contact maps reveals spatially active regions in the human genome. *Cell*  
21 *reports*. 17:2042-2059.
- 22 48. Kundaje A, Meuleman W, Ernst J, Bilenky M, Yen A, Heravi-Moussavi A, et al. (2015):  
23 Integrative analysis of 111 reference human epigenomes. *Nature*. 518:317.
- 24 49. Rutten-Jacobs LC, Tozer DJ, Duering M, Malik R, Dichgans M, Markus HS, et al.  
25 (2018): Genetic study of white matter integrity in UK Biobank (N= 8448) and the overlap  
26 with stroke, depression, and dementia. *Stroke*. 49:1340-1347.
- 27 50. Elliott LT, Sharp K, Alfaro-Almagro F, Shi S, Miller KL, Douaud G, et al. (2018):  
28 Genome-wide association studies of brain imaging phenotypes in UK Biobank. *Nature*.  
29 562:210.
- 30 51. Lee JJ, Wedow R, Okbay A, Kong E, Maghazian O, Zacher M, et al. (2018): Gene  
31 discovery and polygenic prediction from a genome-wide association study of  
32 educational attainment in 1.1 million individuals. *Nature genetics*. 50:1112.

- 1 52. Nagel M, Jansen PR, Stringer S, Watanabe K, de Leeuw CA, Bryois J, et al. (2018):  
2 Meta-analysis of genome-wide association studies for neuroticism in 449,484 individuals  
3 identifies novel genetic loci and pathways. *Nature Genetics*. 50:920.
- 4 53. Davies G, Lam M, Harris SE, Trampush JW, Luciano M, Hill WD, et al. (2018): Study  
5 of 300,486 individuals identifies 148 independent genetic loci influencing general  
6 cognitive function. *Nature communications*. 9:2098.
- 7 54. Luciano M, Hagenaars SP, Davies G, Hill WD, Clarke T-K, Shirali M, et al. (2018):  
8 Association analysis in over 329,000 individuals identifies 116 independent variants  
9 influencing neuroticism. *Nature genetics*. 50:6.
- 10 55. Kouri N, Ross OA, Dombroski B, Younkin CS, Serie DJ, Soto-Ortolaza A, et al. (2015):  
11 Genome-wide association study of corticobasal degeneration identifies risk variants  
12 shared with progressive supranuclear palsy. *Nature communications*. 6:7247.
- 13 56. Lam M, Trampush JW, Yu J, Knowles E, Davies G, Liewald DC, et al. (2017):  
14 Large-Scale Cognitive GWAS Meta-Analysis Reveals Tissue-Specific Neural Expression  
15 and Potential Nootropic Drug Targets. *Cell reports*. 21:2597-2613.
- 16 57. Chang D, Nalls MA, Hallgrímsdóttir IB, Hunkapiller J, van der Brug M, Cai F, et al.  
17 (2017): A meta-analysis of genome-wide association studies identifies 17 new  
18 Parkinson's disease risk loci. *Nature genetics*. 49:1511.
- 19 58. Okbay A, Baselmans BM, De Neve J-E, Turley P, Nivard MG, Fontana MA, et al.  
20 (2016): Genetic variants associated with subjective well-being, depressive symptoms,  
21 and neuroticism identified through genome-wide analyses. *Nature genetics*. 48:624.
- 22 59. Sanchez-Roige S, Palmer AA, Fontanillas P, Elson SL, Team aR, Consortium  
23 SUDWGotPG, et al. (2018): Genome-wide association study meta-analysis of the Alcohol  
24 Use Disorders Identification Test (AUDIT) in two population-based cohorts. *American*  
25 *Journal of Psychiatry*. appi. ajp. 2018.18040369.
- 26 60. Jun G, Ibrahim-Verbaas CA, Vronskaya M, Lambert J-C, Chung J, Naj AC, et al. (2016):  
27 A novel Alzheimer disease locus located near the gene encoding tau protein. *Molecular*  
28 *psychiatry*. 21:108.
- 29 61. Trampush JW, Yang M, Yu J, Knowles E, Davies G, Liewald D, et al. (2017): GWAS  
30 meta-analysis reveals novel loci and genetic correlates for general cognitive function: a  
31 report from the COGENT consortium. *Molecular psychiatry*. 22:336.

- 1 62. Li Z, Chen J, Yu H, He L, Xu Y, Zhang D, et al. (2017): Genome-wide association  
2 analysis identifies 30 new susceptibility loci for schizophrenia. *Nature genetics*. 49:1576.
- 3 63. Bergen S, O'dushlaine C, Ripke S, Lee P, Ruderfer D, Akterin S, et al. (2012):  
4 Genome-wide association study in a Swedish population yields support for greater CNV  
5 and MHC involvement in schizophrenia compared with bipolar disorder. *Molecular*  
6 *psychiatry*. 17:880.
- 7 64. Kramer PL, Xu H, Woltjer RL, Westaway SK, Clark D, Erten-Lyons D, et al. (2011):  
8 Alzheimer disease pathology in cognitively healthy elderly: a genome-wide study.  
9 *Neurobiology of aging*. 32:2113-2122.
- 10 65. Benjamini Y, Hochberg Y (1995): Controlling the false discovery rate: a practical and  
11 powerful approach to multiple testing. *Journal of the royal statistical society Series B*  
12 *(Methodological)*.289-300.
- 13 66. Solovieff N, Cotsapas C, Lee PH, Purcell SM, Smoller JW (2013): Pleiotropy in  
14 complex traits: challenges and strategies. *Nature Reviews Genetics*. 14:483.
- 15 67. Zhao B, Zou F (2018): Is PRS Good for Predicting Complex Polygenic Traits?  
16 *bioRxiv*.447797.
- 17 68. Bach M, Laun FB, Leemans A, Tax CM, Biessels GJ, Stieltjes B, et al. (2014):  
18 Methodological considerations on tract-based spatial statistics (TBSS). *Neuroimage*.  
19 100:358-369.

20  
21  
22  
23  
24  
25  
26  
27  
28  
29  
30  
31  
32

# **1 Captions to figures**

2 Figure 1. SNP heritability estimates grouped by white matter tract functions.

3 Figure 2. Distribution of SNP heritability estimates of the 21 white matter tracts in brain.

4 Figure 3. Heritability estimated by SNPs in each chromosome or in functionally  
5 annotated SNP categories.

6 Figure 4. Number of independent significant SNPs discovered for each DTI parameter at  
7 different GWAS significance levels. Outer layer: p-value  $<5 \times 10^{-8}$ ; middle layer: p-value  
8  $<5 \times 10^{-9}$ ; and inner layer: p-value  $<4.5 \times 10^{-10}$ .

9 Figure 5. Genes identified in gene-based association analysis of DTI parameters that  
10 have been implicated with traits of neuroticism, neurodegenerative diseases,  
11 neuropsychiatric disorders, education, cognitive, and reaction time in previous GWAS.

12 Figure 6. Selected pairwise genetic correlations between DTI parameters and other  
13 traits.



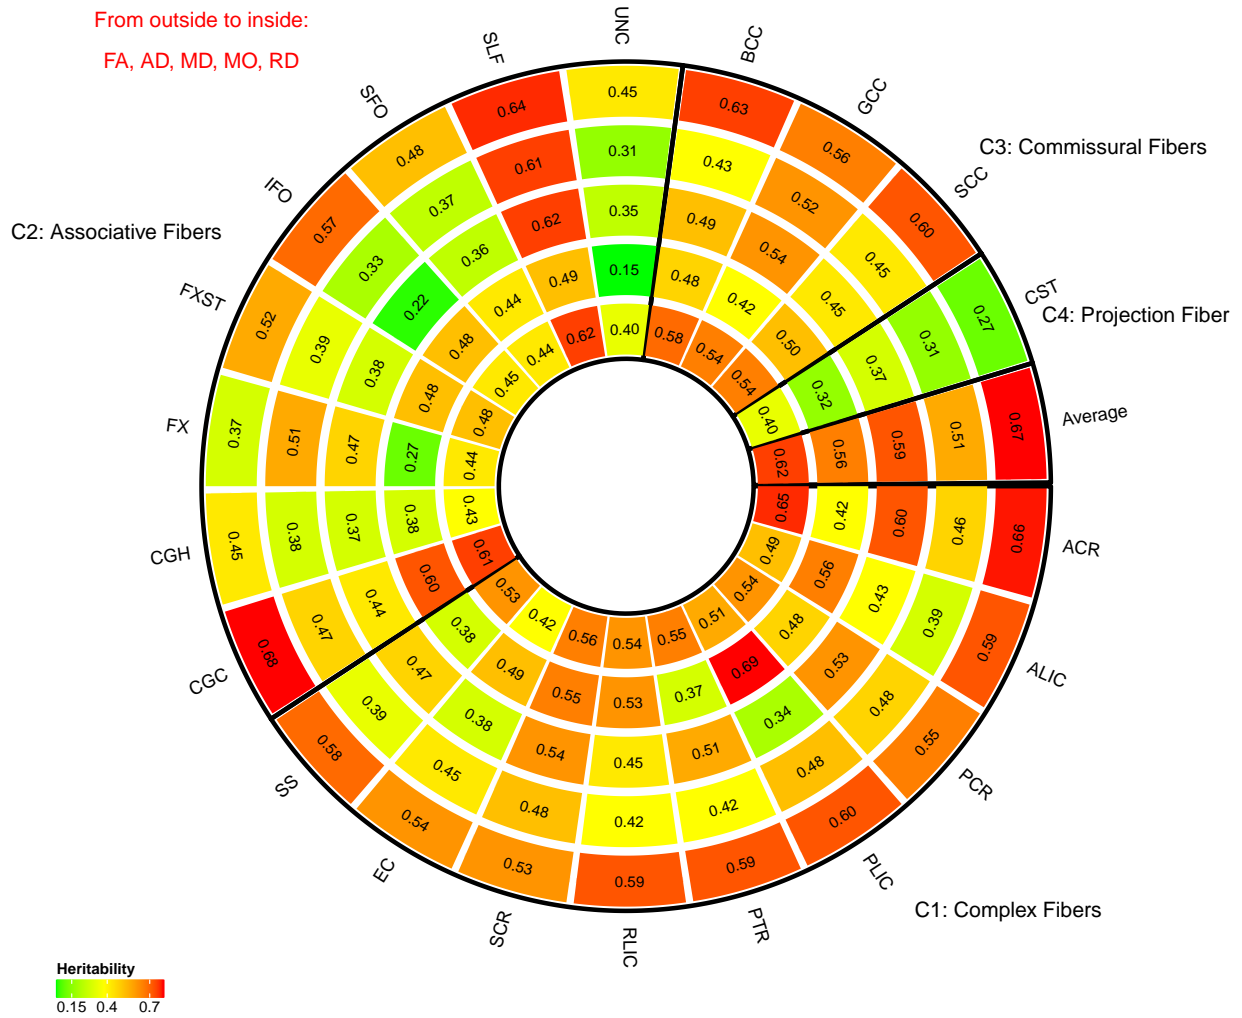

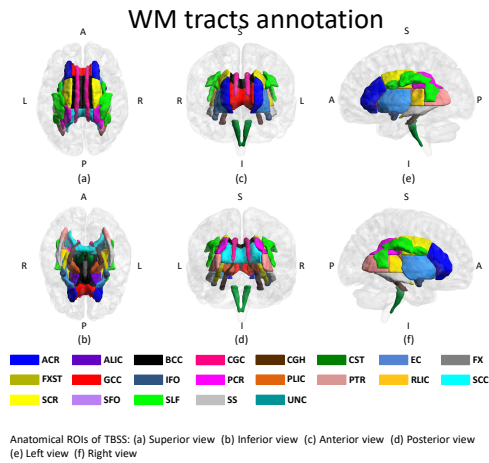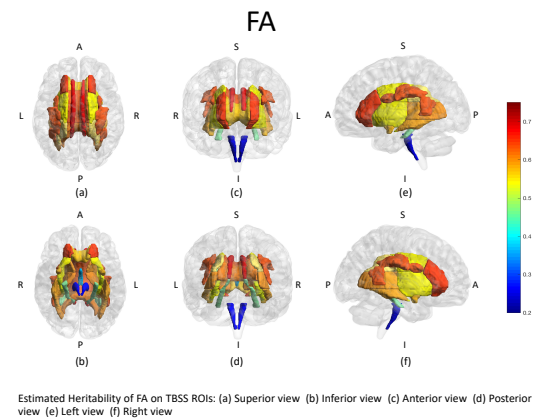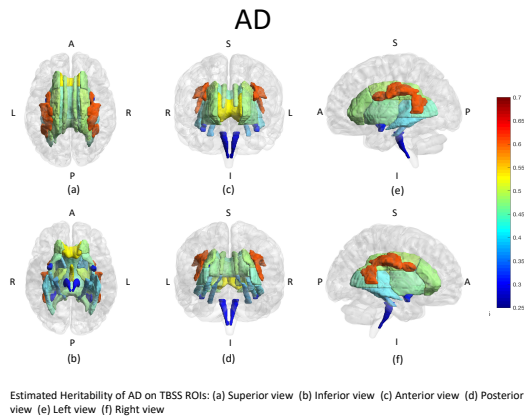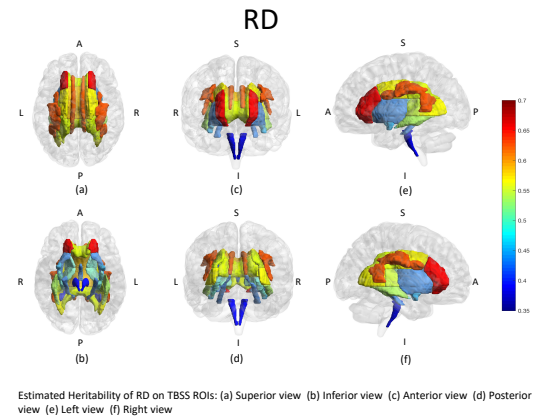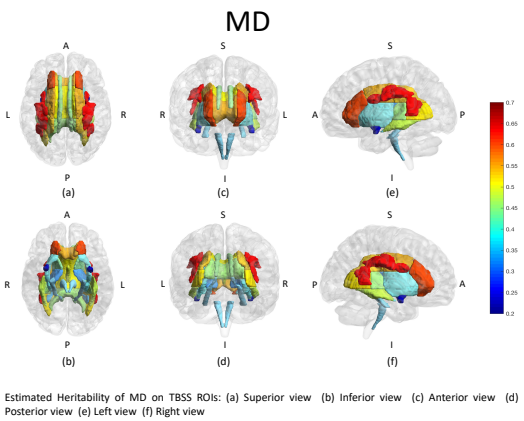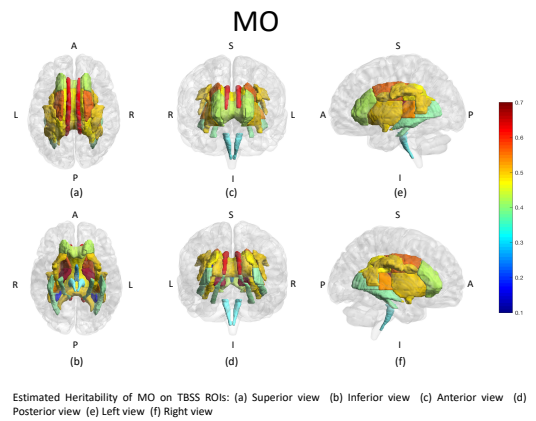

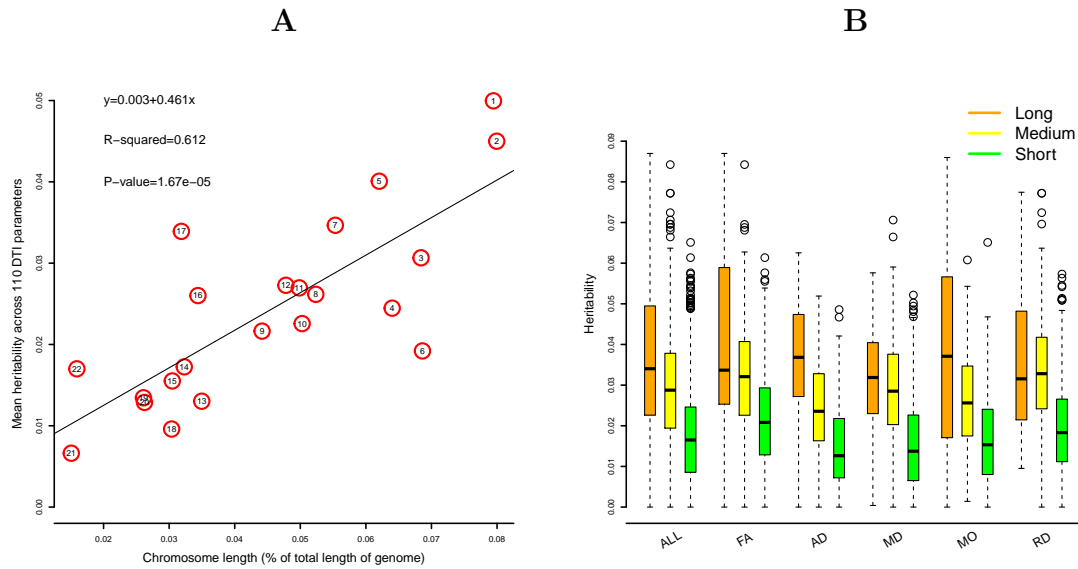

(a) Mean SNP heritability of each chromosome. (b) SNP heritability grouped by chromosome length.

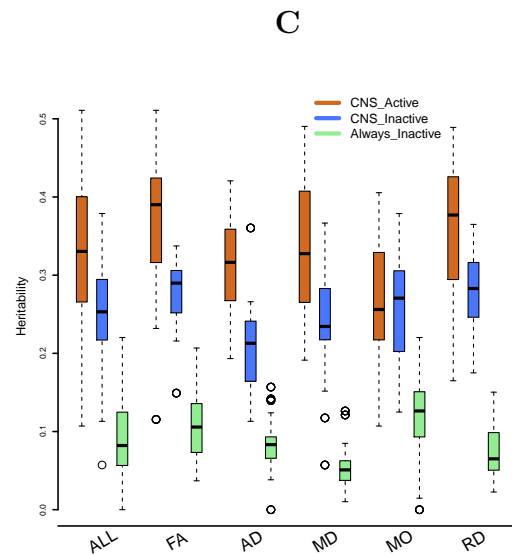

(c) SNP heritability grouped by CNS functional annotations.



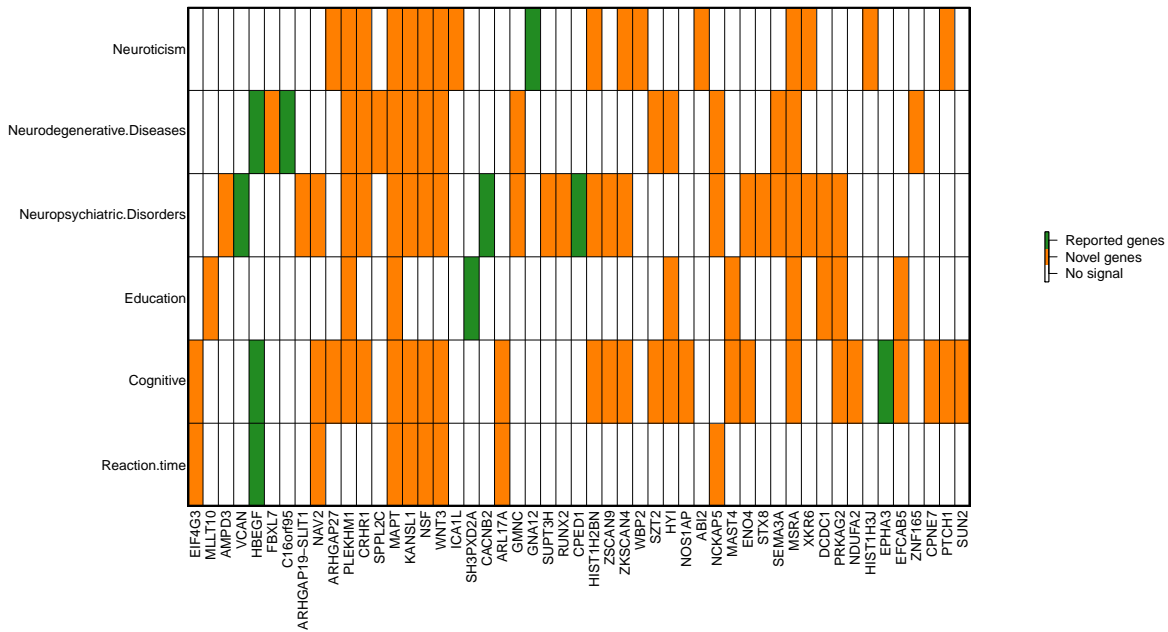

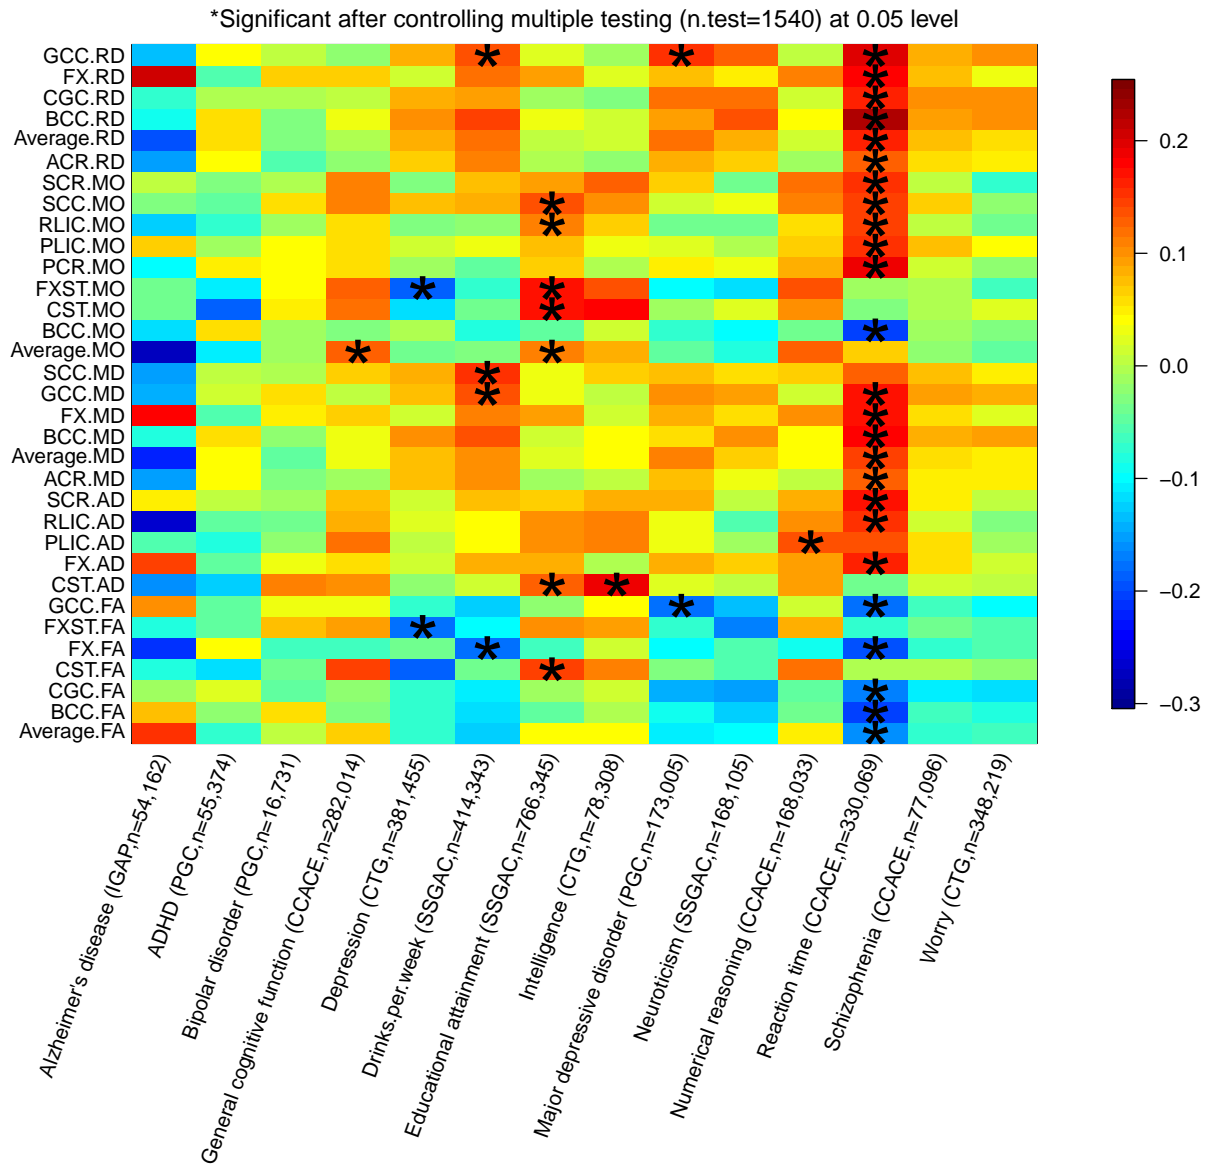

Source: https://www.biorxiv.org/content/10.1101/288555v4.full.pdf
